# Supplementary material for: Modification of Mcl-1 alternative splicing induces apoptosis and suppresses tumor proliferation in gastric cancer
Source: Aging (Albany NY). 2020 Oct 14;12(19):19293–315. doi: 10.18632/aging.103766 (PMC7732305; doi:10.18632/aging.103766)
Supplement: Supplementary Table 1 [file aging-12-103766-s002..pdf]

## SUPPLEMENTARY TABLE

**Supplementary Table 1. The clinical characteristics and the ratio of Mcl-1 isoform in enrolled patients with gastric adenocarcinoma.**

| Variables                   | n (%)       | Mcl-1S / Mcl-1L (mRNA) | p value |
|-----------------------------|-------------|------------------------|---------|
| <b>Age (years)</b>          |             |                        | 0.597   |
| <57 (Median)                | 26 (44.07%) | 0.27±0.17              |         |
| ≥57                         | 33 (55.93%) | 0.33±0.51              |         |
| <b>Sex</b>                  |             |                        | 0.927   |
| Male                        | 38 (64.41%) | 0.30±0.45              |         |
| Female                      | 21 (35.59%) | 0.31±0.28              |         |
| <b>TNM stage (Clinical)</b> |             |                        | <0.001  |
| I                           | 8 (13.56%)  | 0.59±0.23              |         |
| IIA                         | 8 (13.56%)  | 0.20±0.03              |         |
| IIB                         | 12 (20.34%) | 0.18±0.10              |         |
| IIIA                        | 8 (13.56%)  | 0.79±0.82              |         |
| IIIB                        | 4 (6.78%)   | 0.06±0.02              |         |
| IIIC                        | 18 (30.51%) | 0.16±0.15              |         |
| IV                          | 1 (1.69%)   | 0.21                   |         |
| <b>Pathologic grades</b>    |             |                        | 0.334   |
| G1                          | 16 (27.12%) | 0.30±0.21              |         |
| G2                          | 20 (33.90%) | 0.21±0.22              |         |
| G3                          | 23 (38.98%) | 0.39±0.57              |         |

Age group was distinguished based on the median age. All data meet normal distribution and independent-sample t test was used for comparisons between two groups. One-way ANOVA was performed for intergroup difference. Data are presented as the mean±SD. P<0.05 indicated statistical significance.
